# Supplementary material for: Structural and functional investigation into acetyl-coenzyme A synthase and methyltransferase from human pathogen Clostridium difficile
Source: Royal Society of Chemistry journal article supplement (doi:10.1039/c3mt20257g), 2013-01-01

## Supplementary Information

**Figure S1 (A)** Sequence alignment of MeTr<sub>Cd</sub> and MeTr<sub>Mt</sub>, completely conserved sequences labeled in black. Substrate binding residues were labeled in red and yellow.

**(B)** Partial sequence alignment of ACS<sub>Cd</sub>, ACS<sub>Ch</sub> and ACS<sub>Mt</sub>, completely conserved residues labeled in black. The residues of the metal center of A-cluster were labeled in red.

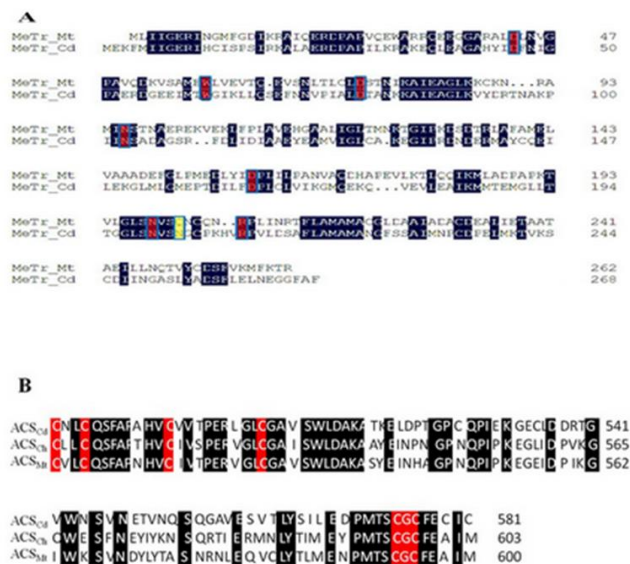

**Figure S2** Antibacterial activity for *Clostridium difficile* (strain: ATCC 43255 and ATCC 9689) by different chelators of A (8-hydroxyquinoline), B (2,2-dipyridyl) and C (1,10-phenanthroline) in different concentration, respectively. A paper disc containing 30 ng vancomycin was shown as positive control.

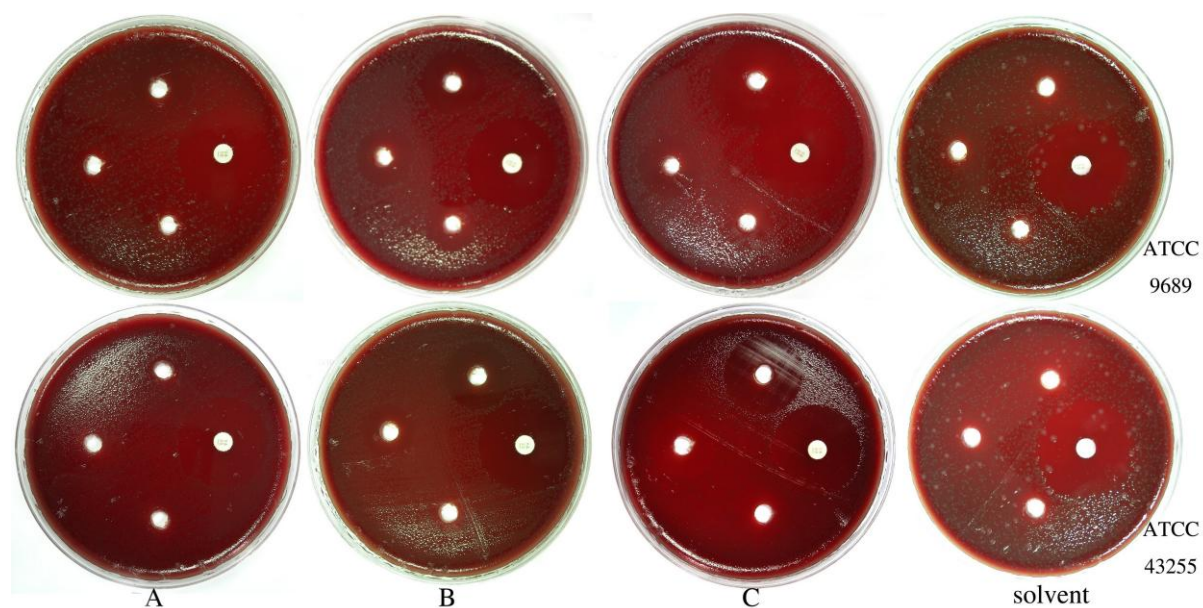

**Figure S3 (A)** Ni X-ray absorption edge spectra of Ni-recombinant ACS<sub>Cd</sub>; **(B)** Ni-K edge EXAFS (left) and corresponding Fourier transform (right) for ACS<sub>Cd</sub> including fit with two nitrogen ligands, five sulfur ligands and one oxygen ligand for two Ni. All Ni-S distances were assumed to be identical to lower the number of fit parameters. The Ni-metal contributions, refined to 2.690 Å for Ni-Ni, 1.879 Å for Ni-N, 2.177 Å for Ni-S bond distance, respectively, result in the FT-peak at 3 Å due to the first shell phase shift correction applied.

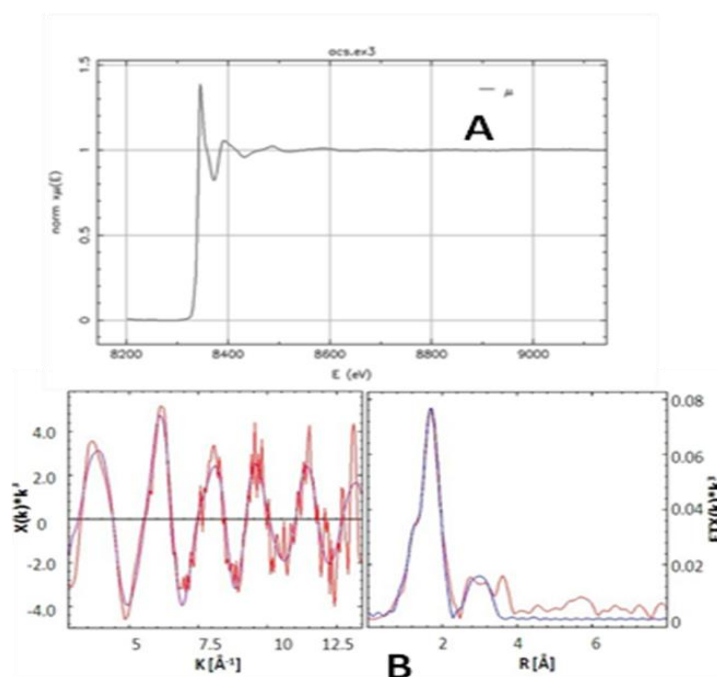

Supplement: c3mt20257g.pdf [file c3mt20257g.pdf]
